# Supplementary material for: Speech and Language Therapy for Voice Problems in Parkinson’s Disease: A Meta-Analysis
Source: Atypon-hosted journal article supplement (doi:10.1176/appi.neuropsych.19020044), 2020-05-06
Supplement: appi.neuropsych.19020044.ds001.pdf [file appi.neuropsych.19020044.ds001.pdf]

**Table S1. Quality assessment of the included RCTs included in the meta-analysis**

| Study                         | Random sequence generation | Allocation concealment | Blinding (participants and personnel) | Blinding (outcome assessment) | Incomplete outcome data | Selective reporting | Other sources of bias |
|-------------------------------|----------------------------|------------------------|---------------------------------------|-------------------------------|-------------------------|---------------------|-----------------------|
| Johnson and Pring (1990) (10) | unclear                    | unclear                | unclear                               | low                           | low                     | low                 | low                   |
| Ramig et al. (1995) (21)      | low                        | unclear                | unclear                               | unclear                       | low                     | low                 | unclear               |
| Ramig et al. (1996) (14)      | low                        | unclear                | unclear                               | unclear                       | low                     | low                 | unclear               |
| Ramig et al. (2001) (17)      | low                        | unclear                | unclear                               | unclear                       | low                     | low                 | low                   |
| Ramig et al. (2001) (13)      | low                        | unclear                | high                                  | low                           | low                     | low                 | unclear               |
| Halpern et al. (2012) (15)    | unclear                    | unclear                | unclear                               | unclear                       | low                     | low                 | low                   |
| Tang et al. (2016) (16)       | unclear                    | unclear                | unclear                               | unclear                       | low                     | low                 | low                   |
| Yang et al. (2017) (12)       | unclear                    | unclear                | unclear                               | unclear                       | low                     | low                 | low                   |
| Sackley et al. (2018) (11)    | low                        | unclear                | low                                   | low                           | low                     | unclear             | low                   |
| Ramig et al. (2018) (9)       | low                        | low                    | high                                  | unclear                       | low                     | low                 | low                   |

Abbreviation: RCT=randomized controlled trial.
